# Supplementary material for: CCR9/CXCR5 Co-Expressing CD4 T Cells Are Increased in Primary Sjögren’s Syndrome and Are Enriched in PD-1/ICOS-Expressing Effector T Cells
Source: MDPI journal article supplement (doi:10.3390/ijms241511952), 2023-07-26
Supplement: s1 [file s1]

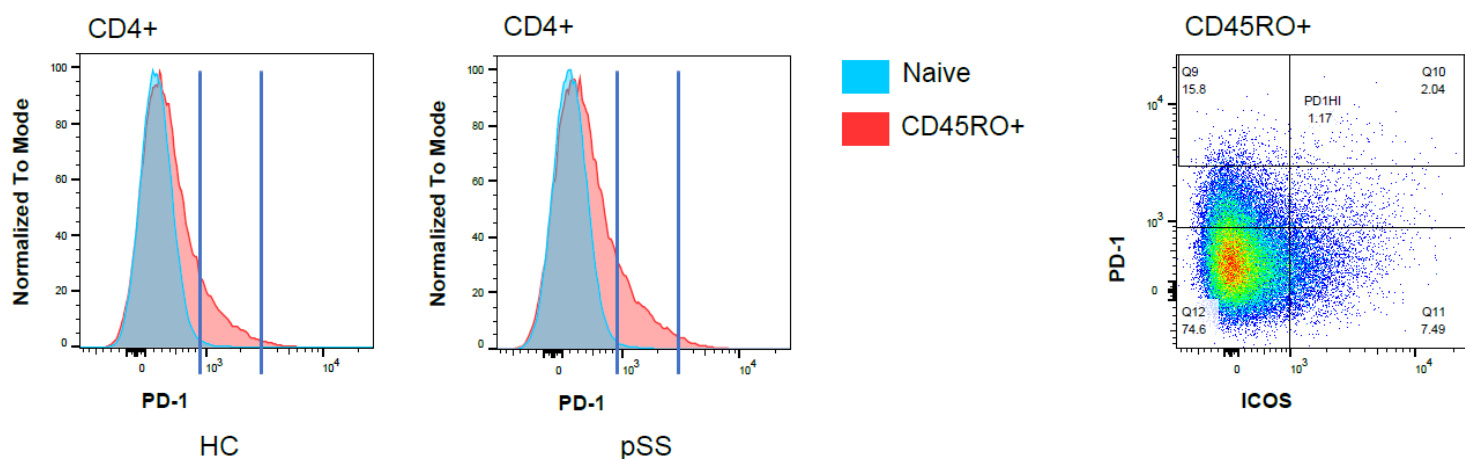

**Supplementary Figure S1. PD-hi staining**

Representative histograms of PD-1 staining in naive and memory (CD45RO+) CD4 T cells from one HC and one pSS patient. Vertical lines in histograms indicate gating of PD-1 negative, PD-1<sup>intermediate</sup>, and PD-1<sup>hi</sup> populations, as can also be seen in representative ICOS/PD-1 dotplot from memory CD4 T cells. HC: healthy control; pSS: primary Sjögren's syndrome; ICOS: inducible T cell co-stimulator; PD-1: programmed death-1.

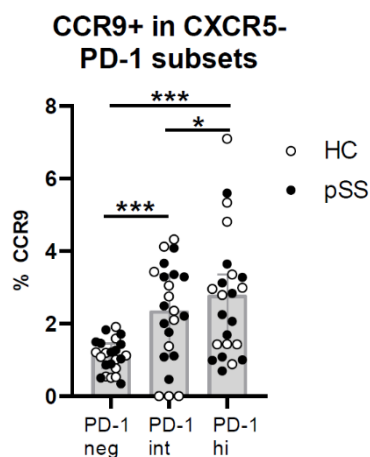

**Supplementary Figure S2. The percentage of CCR9-expressing cells is associated with PD-1 expression**

CCR9 expression is evaluated on total (incl naïve and memory) CXCR5- CD4 T cells with negative, intermediate, and high PD-1 expression. HC: healthy control; pSS: primary Sjögren's syndrome. CCR9: C-C motif chemokine receptor 9; PD-1: programmed death-1; neg: negative; int: intermediate; hi: high. \*, \*\*\* indicates p-value <0.05, 0.001, respectively.

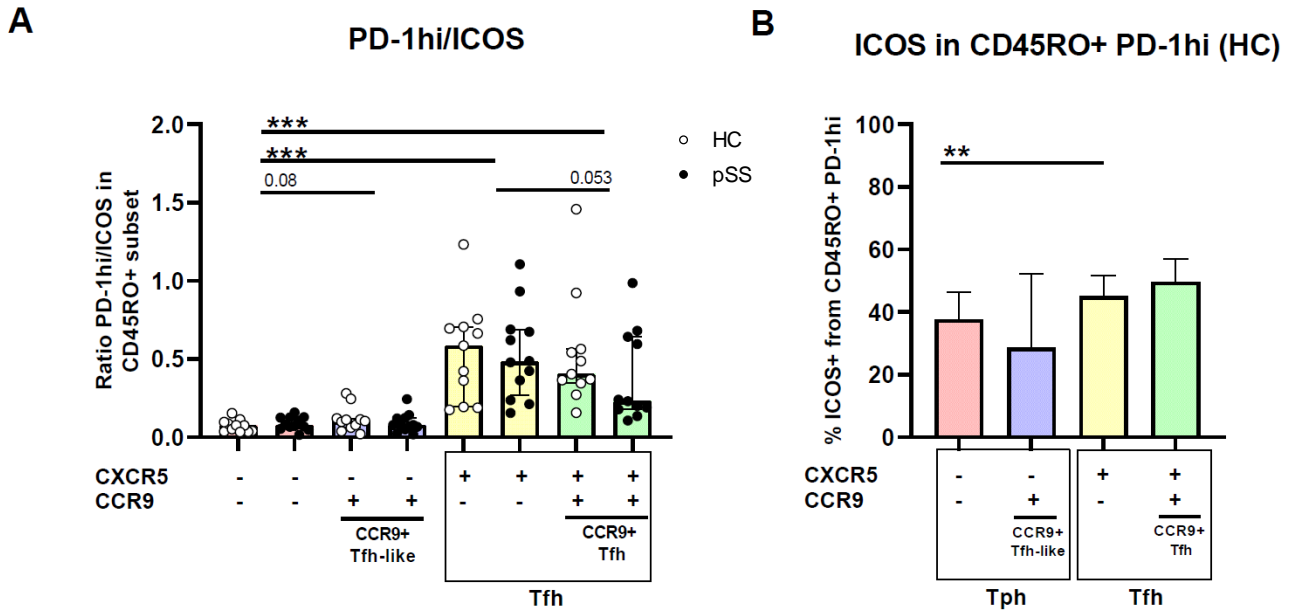

**Supplementary Figure S3. CXCR5-expressing cells have a higher PD-1<sup>hi</sup>/ICOS ratio. Increased ICOS expression in HC was only seen for CXCR5-expressing Tfh cells compared to CXCR5-CCR9<sup>-</sup> cells.**

(A) Ratios of PD-1<sup>hi</sup>/ICOS in memory population of all four CXCR5/CCR9-defined cell subsets in pSS patients and HC. (B) Comparison of ICOS expression between the memory PD-1<sup>hi</sup> CXCR5-CCR9<sup>-</sup> subset compared to the three other subsets in HC. Plots show medians plus interquartile ranges. HC: healthy control; pSS: primary Sjögren's syndrome. Tph: T peripheral helper cell (memory CXCR5-PD-1<sup>hi</sup> CD4 T cell); CCR9<sup>+</sup> Tfh-like: C-C motif chemokine receptor 9-expressing T follicular helper-like cell (CXCR5-CCR9<sup>+</sup> CD4 T cell); ICOS: inducible T cell co-stimulator; PD-1: programmed death-1; \*\*, \*\*\* indicates p-value <0.01, 0.001, respectively.

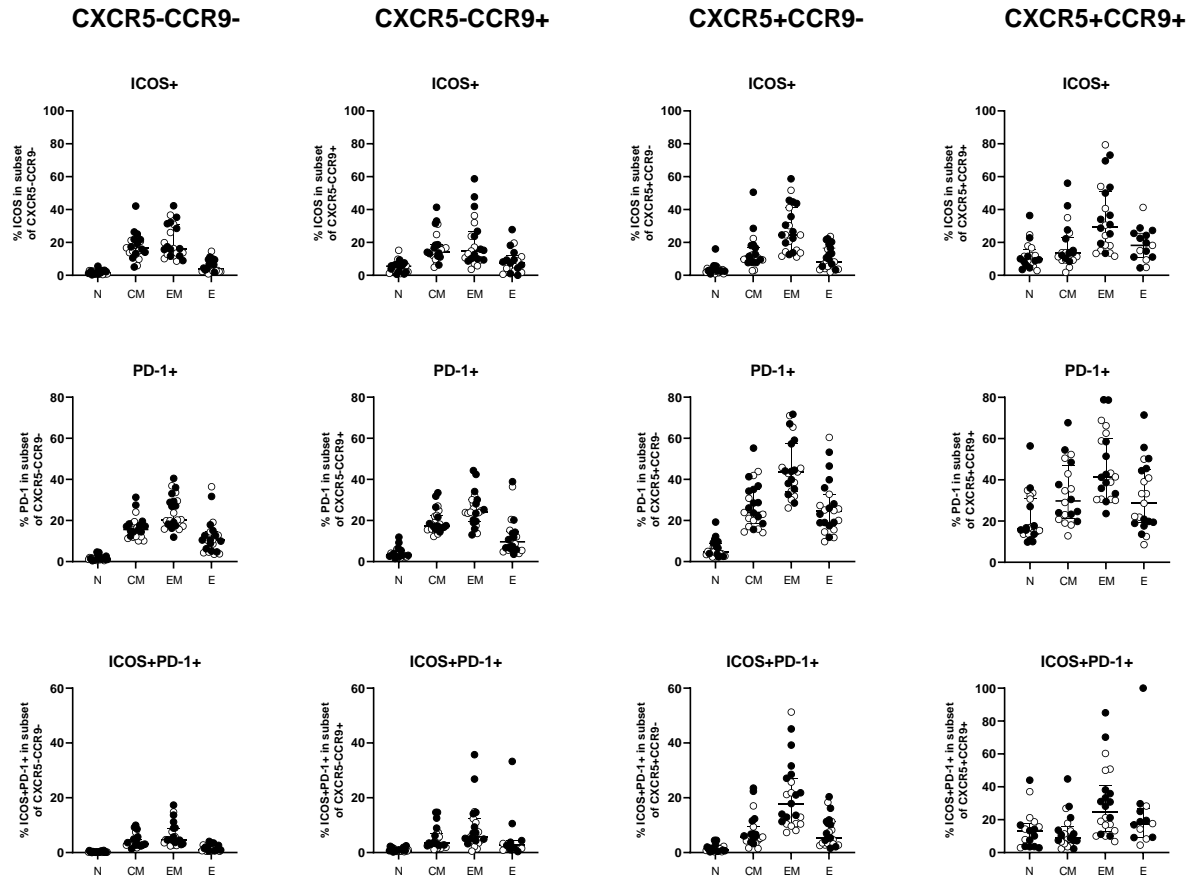

**Supplementary Figure S4. ICOS+, PD-1+, and ICOS+PD-1+ are significantly lower in naive cells in all CXCR5/CCR9-defined cell subsets.**

Expression of ICOS, PD-1, and ICOS+PD-1+ in naive (N), central memory (CM), effector memory (EM), and effector (E) cells in all four CXCR5/CCR9-defined cell subsets. All comparisons between N cells and CM/EM/E cells are significant within the same CXCR5/CCR9-defined cell subset ( $p < 0.01$ ), except for ICOS expression between N and E in CXCR5-CCR9+ and CXCR5+CCR9+ cells ( $p = 0.19$  and  $p = 0.43$ , respectively), and ICOS+PD-1+ expression between N and E cells in CXCR5+CCR9+ subset ( $p = 0.21$ ). Plots show medians plus interquartile ranges. Naive (N): CD27+CD45RO-; Central memory (CM): CD27+CD45RO+; Effector memory (EM): CD27-CD45RO+; Effector (E): CD27-CD45RO-.

**Supplementary Table S1. Antibodies used for flow cytometry.**

| <b>Marker</b>                | <b>Fluorochrome</b> | <b>Company</b>     | <b>Clone</b> |
|------------------------------|---------------------|--------------------|--------------|
| <b>CD3</b>                   | AF700               | Sony Biotechnology | UCHT1        |
| <b>CD4</b>                   | BV785               | Biolegend          | RPA-T4       |
| <b>CD8</b>                   | PE                  | Biolegend          | RPA-T8       |
| <b>CCR9</b>                  | APC                 | Biolegend          | L053E8       |
| <b>CXCR5</b>                 | PerCP-Cy5.5         | Biolegend          | J252D4       |
| <b>CD27</b>                  | BV510               | BD Biosciences     | L128         |
| <b>CD45RO</b>                | PE-Cy7              | BD Biosciences     | UCHL1        |
| <b>ICOS</b>                  | FITC                | Biolegend          | C398.4A      |
| <b>PD-1</b>                  | BV711               | BD Biosciences     | EH12.1       |
| <b>Fixable Viability Dye</b> | eFluor™ 780         | eBioscience        | n.a.         |
